# Supplementary material
Source: publisher site journal article supplement (https://www.dovepress.com/article/532010)
Supplement: Supplementary file 1 [file Supplementary%20data_15.09.2025.docx]

# **Supplementary Material**

**Supplementary Figure 1** EQ-5D-3L weights in the United Kingdom and the United States


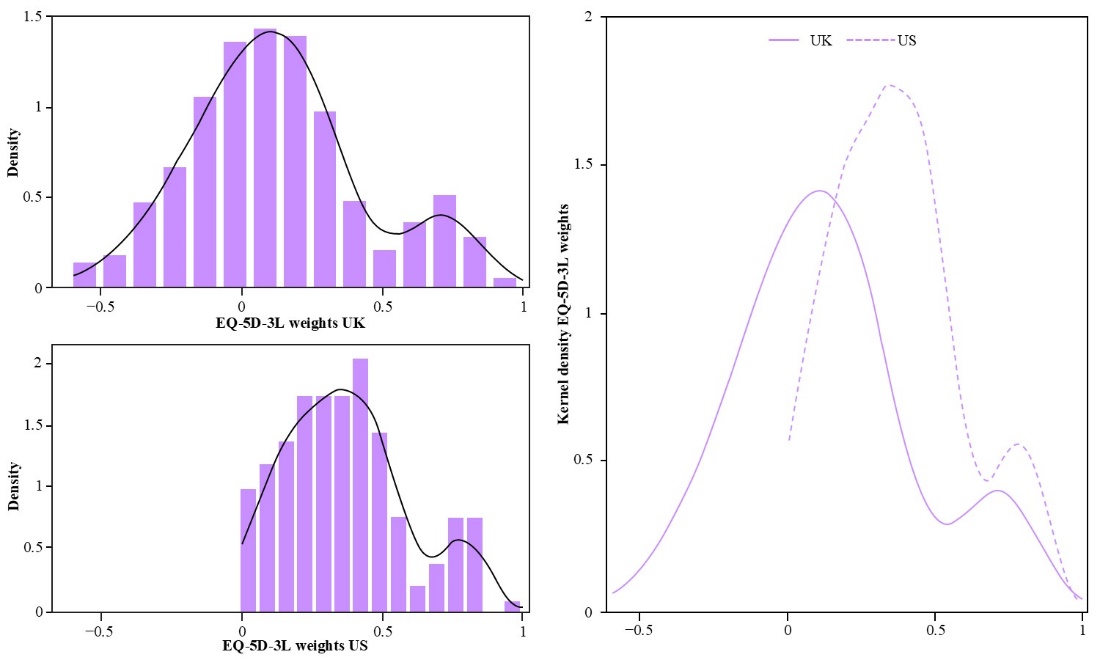


**Abbreviations:** EQ-5D-3L, EuroQoL five-dimensions three-levels; UK, United Kingdom; US, United States

**Supplementary Table 1** Reported mean US and UK EQ-5D-3L and predicted UK utility scores

| **Author(s), (year)** | **Disease condition** | **Category** | **Reported mean utility** | | **Δa** | **UK-predicted mean utility** | **Δb** | **Δc** |
| --- | --- | --- | --- | --- | --- | --- | --- | --- |
| **US** | **UK** |
| Bansback *et al*., (2012)1 | General population with no problems | NA | 0.850 | 0.800 | 0.050 | 0.801 | 0.001 | 0.049 |
| Falk Hvidberg and Hernández Alava (2023)2 | Viral hepatitis and HIV disease | All | 0.799 | 0.726 | 0.073 | 0.730 | 0.004 | 0.069 |
| M | 0.789 | 0.714 | 0.075 | 0.716 | 0.002 | 0.073 |
| F | 0.808 | 0.738 | 0.070 | 0.742 | 0.004 | 0.066 |
| Age (16–44) | 0.793 | 0.713 | 0.080 | 0.721 | 0.008 | 0.072 |
| Age (45–74) | 0.805 | 0.740 | 0.065 | 0.738 | −0.002 | 0.067 |
| Malignant neoplasms | All | 0.803 | 0.736 | 0.067 | 0.735 | −0.001 | 0.068 |
| M | 0.814 | 0.752 | 0.062 | 0.751 | −0.001 | 0.063 |
| F | 0.794 | 0.724 | 0.070 | 0.723 | −0.001 | 0.071 |
| Age (16–44) | 0.856 | 0.814 | 0.042 | 0.809 | −0.005 | 0.047 |
| Age (45–74) | 0.816 | 0.754 | 0.062 | 0.753 | −0.001 | 0.063 |
| Age +75 | 0.749 | 0.659 | 0.090 | 0.660 | 0.001 | 0.089 |
| Unknown in situ, benign/neoplasms, diseases of blood/blood-forming organs | All | 0.768 | 0.687 | 0.081 | 0.687 | 0 | 0.081 |
| M | 0.814 | 0.662 | 0.152 | 0.751 | 0.089 | 0.063 |
| F | 0.794 | 0.701 | 0.093 | 0.723 | 0.022 | 0.071 |
| Age (16–44) | 0.856 | 0.812 | 0.044 | 0.809 | −0.003 | 0.047 |
| Age (45–74) | 0.775 | 0.697 | 0.078 | 0.696 | −0.001 | 0.079 |
| Age +75 | 0.658 | 0.530 | 0.128 | 0.534 | 0.004 | 0.124 |
| Endocrine, nutritional and metabolic diseases | All | 0.807 | 0.742 | 0.065 | 0.741 | −0.001 | 0.066 |
| M | 0.821 | 0.762 | 0.059 | 0.760 | −0.002 | 0.061 |
| F | 0.795 | 0.725 | 0.070 | 0.724 | −0.001 | 0.071 |
| Age (16–44) | 0.839 | 0.788 | 0.051 | 0.785 | −0.003 | 0.054 |
| Age (45–74) | 0.818 | 0.757 | 0.061 | 0.756 | −0.001 | 0.062 |
| Age +75 | 0.759 | 0.674 | 0.085 | 0.674 | 0 | 0.085 |
| Nervous system diseases | All | 0.775 | 0.697 | 0.078 | 0.696 | −0.001 | 0.079 |
| M | 0.783 | 0.708 | 0.075 | 0.707 | −0.001 | 0.076 |
| F | 0.771 | 0.690 | 0.081 | 0.691 | 0.001 | 0.080 |
| Age (16–44) | 0.813 | 0.752 | 0.061 | 0.749 | −0.003 | 0.064 |
| Age (45–74) | 0.774 | 0.694 | 0.080 | 0.695 | 0.001 | 0.079 |
| Age +75 | 0.697 | 0.586 | 0.111 | 0.588 | 0.002 | 0.109 |
| Diseases of eye, adnexa, ear and mastoid process | All | 0.803 | 0.736 | 0.067 | 0.735 | −0.001 | 0.068 |
| M | 0.824 | 0.767 | 0.057 | 0.764 | −0.003 | 0.060 |
| F | 0.781 | 0.705 | 0.076 | 0.705 | 0 | 0.076 |
| Age (16–44) | 0.861 | 0.819 | 0.042 | 0.816 | −0.003 | 0.045 |
| Age (45–74) | 0.823 | 0.765 | 0.058 | 0.763 | −0.002 | 0.060 |
| Age +75 | 0.749 | 0.659 | 0.090 | 0.660 | 0.001 | 0.089 |
| Circulatory system diseases | All | 0.807 | 0.741 | 0.066 | 0.741 | 0 | 0.066 |
| M | 0.820 | 0.760 | 0.060 | 0.759 | −0.001 | 0.061 |
| F | 0.796 | 0.726 | 0.070 | 0.725 | −0.001 | 0.071 |
| Age (16–44) | 0.847 | 0.798 | 0.049 | 0.796 | −0.002 | 0.051 |
| Age (45–74) | 0.817 | 0.756 | 0.061 | 0.755 | −0.001 | 0.062 |
| Age +75 | 0.755 | 0.668 | 0.087 | 0.668 | 0 | 0.087 |
| Respiratory system diseases | All | 0.831 | 0.776 | 0.055 | 0.774 | −0.002 | 0.057 |
| M | 0.851 | 0.803 | 0.048 | 0.802 | −0.001 | 0.049 |
| F | 0.818 | 0.757 | 0.061 | 0.756 | −0.001 | 0.062 |
| Age (16–44) | 0.880 | 0.845 | 0.035 | 0.842 | −0.003 | 0.038 |
| Age (45–74) | 0.815 | 0.753 | 0.062 | 0.752 | −0.001 | 0.063 |
| Age +75 | 0.736 | 0.641 | 0.095 | 0.642 | 0.001 | 0.094 |
| Digestive system diseases | All | 0.773 | 0.692 | 0.081 | 0.694 | 0.002 | 0.079 |
| M | 0.792 | 0.721 | 0.071 | 0.720 | −0.001 | 0.072 |
| F | 0.756 | 0.669 | 0.087 | 0.670 | 0.001 | 0.086 |
| Age (16–44) | 0.833 | 0.780 | 0.053 | 0.777 | −0.003 | 0.056 |
| Age (45–74) | 0.772 | 0.692 | 0.080 | 0.692 | 0 | 0.080 |
| Age +75 | 0.678 | 0.558 | 0.120 | 0.561 | 0.003 | 0.117 |
| Skin and subcutaneous tissue diseases | All | 0.813 | 0.749 | 0.064 | 0.749 | 0 | 0.064 |
| M | 0.827 | 0.769 | 0.058 | 0.769 | 0 | 0.058 |
| F | 0.799 | 0.730 | 0.069 | 0.730 | 0 | 0.069 |
| Age (16–44) | 0.869 | 0.832 | 0.037 | 0.827 | −0.005 | 0.042 |
| Age (45–74) | 0.804 | 0.733 | 0.071 | 0.737 | 0.004 | 0.067 |
| Age +75 | 0.738 | 0.647 | 0.091 | 0.645 | −0.002 | 0.093 |
| Musculoskeletal system and connective tissue diseases | All | 0.782 | 0.705 | 0.077 | 0.706 | 0.001 | 0.076 |
| M | 0.801 | 0.732 | 0.069 | 0.732 | 0 | 0.069 |
| F | 0.767 | 0.683 | 0.084 | 0.685 | 0.002 | 0.082 |
| Age (16–44) | 0.817 | 0.754 | 0.063 | 0.755 | 0.001 | 0.062 |
| Age (45–74) | 0.782 | 0.704 | 0.078 | 0.706 | 0.002 | 0.076 |
| Age +75 | 0.729 | 0.630 | 0.099 | 0.632 | 0.002 | 0.097 |
| Genitourinary system diseases | All | 0.725 | 0.625 | 0.100 | 0.627 | 0.002 | 0.098 |
| M | 0.746 | 0.656 | 0.090 | 0.656 | 0 | 0.090 |
| F | 0.695 | 0.579 | 0.116 | 0.585 | 0.006 | 0.110 |
| Age (16–44) | 0.727 | 0.616 | 0.111 | 0.630 | 0.014 | 0.097 |
| Age (45–74) | 0.744 | 0.653 | 0.091 | 0.653 | 0 | 0.091 |
| Age +75 | 0.700 | 0.592 | 0.108 | 0.592 | 0 | 0.108 |
| Congenital malformations, deformations and chromosomal abnormalities | All | 0.836 | 0.782 | 0.054 | 0.781 | −0.001 | 0.055 |
| M | 0.854 | 0.807 | 0.047 | 0.806 | −0.001 | 0.048 |
| F | 0.823 | 0.764 | 0.059 | 0.763 | −0.001 | 0.060 |
| Age (16–44) | 0.872 | 0.833 | 0.039 | 0.831 | −0.002 | 0.041 |
| Age (45–74) | 0.799 | 0.730 | 0.069 | 0.730 | 0 | 0.069 |
| Age +75 | 0.742 | 0.651 | 0.091 | 0.650 | −0.001 | 0.092 |
| Mental and behavioural disorders | All | 0.742 | 0.651 | 0.091 | 0.650 | −0.001 | 0.092 |
| M | 0.750 | 0.665 | 0.085 | 0.662 | −0.003 | 0.088 |
| F | 0.736 | 0.642 | 0.094 | 0.642 | 0 | 0.094 |
| Age (16–44) | 0.782 | 0.711 | 0.071 | 0.706 | −0.005 | 0.076 |
| Age (45–74) | 0.733 | 0.636 | 0.097 | 0.638 | 0.002 | 0.095 |
| Age +75 | 0.639 | 0.504 | 0.135 | 0.507 | 0.003 | 0.132 |
| Diagnosed overweight | All | 0.797 | 0.726 | 0.071 | 0.727 | 0.001 | 0.070 |
| M | 0.769 | 0.683 | 0.086 | 0.688 | 0.005 | 0.081 |
| F | 0.805 | 0.737 | 0.068 | 0.738 | 0.001 | 0.067 |
| Age (16–44) | 0.835 | 0.780 | 0.055 | 0.780 | 0 | 0.055 |
| Age (45–74) | 0.760 | 0.671 | 0.089 | 0.675 | 0.004 | 0.085 |
| Age +75 | 0.707 | 0.601 | 0.106 | 0.602 | 0.001 | 0.105 |
| Having no chronic conditions | All | 0.926 | 0.908 | 0.018 | 0.906 | −0.002 | 0.020 |
| M | 0.931 | 0.914 | 0.017 | 0.913 | −0.001 | 0.018 |
| F | 0.920 | 0.900 | 0.020 | 0.898 | −0.002 | 0.022 |
| Age (16–44) | 0.930 | 0.913 | 0.017 | 0.912 | −0.001 | 0.018 |
| Age (45–74) | 0.920 | 0.900 | 0.020 | 0.898 | −0.002 | 0.022 |
| Age +75 | 0.868 | 0.828 | 0.040 | 0.826 | −0.002 | 0.042 |
| Having one or more chronic conditions | All | 0.836 | 0.783 | 0.053 | 0.781 | −0.002 | 0.055 |
| M | 0.850 | 0.803 | 0.047 | 0.801 | −0.002 | 0.049 |
| F | 0.824 | 0.767 | 0.057 | 0.764 | −0.003 | 0.060 |
| Age (16–44) | 0.867 | 0.827 | 0.040 | 0.824 | −0.003 | 0.043 |
| Age (45–74) | 0.832 | 0.777 | 0.055 | 0.776 | −0.001 | 0.056 |
| Age +75 | 0.768 | 0.687 | 0.081 | 0.687 | 0 | 0.081 |
| Depression medicine | All | 0.720 | 0.620 | 0.100 | 0.620 | 0 | 0.100 |
| M | 0.720 | 0.620 | 0.100 | 0.620 | 0 | 0.100 |
| F | 0.720 | 0.620 | 0.100 | 0.620 | 0 | 0.100 |
| Age (16–44) | 0.749 | 0.663 | 0.086 | 0.660 | −0.003 | 0.089 |
| Age (45–74) | 0.720 | 0.618 | 0.102 | 0.620 | 0.002 | 0.100 |
| Age +75 | 0.641 | 0.507 | 0.134 | 0.510 | 0.003 | 0.131 |
| Antipsychotic medicine | All | 0.678 | 0.559 | 0.119 | 0.561 | 0.002 | 0.117 |
| M | 0.688 | 0.576 | 0.112 | 0.575 | −0.001 | 0.113 |
| F | 0.671 | 0.546 | 0.125 | 0.552 | 0.006 | 0.119 |
| Age (16–44) | 0.690 | 0.576 | 0.114 | 0.578 | 0.002 | 0.112 |
| Age (45–74) | 0.689 | 0.575 | 0.114 | 0.577 | 0.002 | 0.112 |
| Age +75 | 0.598 | 0.445 | 0.153 | 0.450 | 0.005 | 0.148 |
| Indication prescribed anxiety medicine | All | 0.711 | 0.607 | 0.104 | 0.607 | 0 | 0.104 |
| M | 0.714 | 0.614 | 0.100 | 0.611 | −0.003 | 0.103 |
| F | 0.709 | 0.604 | 0.105 | 0.605 | 0.001 | 0.104 |
| Age (16–44) | 0.728 | 0.634 | 0.094 | 0.631 | −0.003 | 0.097 |
| Age (45–74) | 0.717 | 0.613 | 0.104 | 0.616 | 0.003 | 0.101 |
| Age +75 | 0.609 | 0.458 | 0.151 | 0.465 | 0.007 | 0.144 |
| Heart failure medication | All | 0.707 | 0.607 | 0.100 | 0.602 | −0.005 | 0.105 |
| M | 0.724 | 0.631 | 0.093 | 0.625 | −0.006 | 0.099 |
| F | 0.679 | 0.571 | 0.108 | 0.563 | −0.008 | 0.116 |
| Age (45–74) | 0.699 | 0.603 | 0.096 | 0.591 | −0.012 | 0.108 |
| Age +75 | 0.699 | 0.593 | 0.106 | 0.591 | −0.002 | 0.108 |
| Ischaemic heart medication | All | 0.734 | 0.637 | 0.097 | 0.639 | 0.002 | 0.095 |
| M | 0.756 | 0.668 | 0.088 | 0.670 | 0.002 | 0.086 |
| F | 0.710 | 0.604 | 0.106 | 0.606 | 0.002 | 0.104 |
| Age (16–44) | 0.778 | 0.704 | 0.074 | 0.700 | −0.004 | 0.078 |
| Age (45–74) | 0.759 | 0.673 | 0.086 | 0.674 | 0.001 | 0.085 |
| Age +75 | 0.701 | 0.591 | 0.110 | 0.593 | 0.002 | 0.108 |
| Overall population | All | 0.869 | 0.829 | 0.040 | 0.827 | −0.002 | 0.042 |
| M | 0.883 | 0.849 | 0.034 | 0.846 | −0.003 | 0.037 |
| F | 0.854 | 0.809 | 0.045 | 0.806 | −0.003 | 0.048 |
| Age (16–44) | 0.901 | 0.873 | 0.028 | 0.871 | −0.002 | 0.030 |
| Age (45–74) | 0.854 | 0.807 | 0.047 | 0.806 | −0.001 | 0.048 |
| Age +75 | 0.773 | 0.694 | 0.079 | 0.694 | 0 | 0.079 |
| Huang et al. (2007)3 | HIV | Patients with HIV | 0.870 | 0.840 | 0.030 | 0.828 | −0.012 | 0.042 |
| CD4 count <200 | 0.860 | 0.830 | 0.030 | 0.814 | −0.016 | 0.046 |
| CD4 count ≥200 | 0.880 | 0.860 | 0.020 | 0.842 | −0.018 | 0.038 |
| Viral load <median | 0.870 | 0.850 | 0.020 | 0.828 | −0.022 | 0.042 |
| Viral load ≥median | 0.860 | 0.840 | 0.020 | 0.814 | −0.026 | 0.046 |
| PHS <median | 0.790 | 0.750 | 0.040 | 0.717 | −0.033 | 0.073 |
| PHS ≥median | 0.930 | 0.930 | 0 | 0.912 | −0.018 | 0.018 |
| MHS <median | 0.800 | 0.750 | 0.050 | 0.731 | −0.019 | 0.069 |
| MHS ≥median | 0.930 | 0.920 | 0.010 | 0.912 | −0.008 | 0.018 |
| Karlsson *et al*., (2011)4 | Rheumatoid arthritis | Baseline | 0.550 | 0.350 | 0.200 | 0.383 | 0.033 | 0.167 |
| 12 months | 0.730 | 0.630 | 0.100 | 0.634 | 0.004 | 0.096 |
| Kiadaliri *et al*., (2015)5 | T2D | NA | 0.830 | 0.770 | 0.060 | 0.773 | 0.003 | 0.057 |
| Lien *et al*., (2015)6 | Metastatic pancreatic cancer | Nausea and Vomiting | 0.526 | 0.352 | 0.174 | 0.350 | −0.002 | 0.176 |
| Diarrhoea | 0.508 | 0.328 | 0.180 | 0.325 | −0.003 | 0.183 |
| Hand and foot syndrome | 0.409 | 0.179 | 0.230 | 0.187 | 0.008 | 0.222 |
| Stomatitis | 0.279 | −0.038 | 0.317 | 0.007 | 0.045 | 0.272 |
| Febrile neutropenia | 0.586 | 0.454 | 0.132 | 0.434 | −0.020 | 0.152 |
| Fatigue | 0.243 | −0.053 | 0.296 | −0.043 | 0.010 | 0.286 |
| Rash | 0.626 | 0.487 | 0.139 | 0.489 | 0.002 | 0.137 |
| Neuropathy | 0.494 | 0.320 | 0.174 | 0.306 | −0.014 | 0.188 |
| Stable disease | 0.720 | 0.643 | 0.077 | 0.620 | −0.023 | 0.100 |
| Supportive care | 0.136 | −0.250 | 0.386 | −0.192 | 0.058 | 0.328 |
| Mozzi *et al*., (2016)7 | Crohn’s disease | NA | 0.690 | 0.570 | 0.120 | 0.578 | 0.008 | 0.112 |
| Noyes *et al*., (2007)8 | Parkinson disease | With Parkinson disease | 0.830 | 0.790 | 0.040 | 0.773 | −0.017 | 0.057 |
| With severe usual activities problems | 0.450 | 0.210 | 0.240 | 0.244 | 0.034 | 0.206 |
| Without usual activities, problems | 0.900 | 0.880 | 0.020 | 0.870 | −0.010 | 0.030 |
| With severe anxiety/depression | 0.420 | 0.140 | 0.280 | 0.203 | 0.063 | 0.217 |
| Without anxiety/depression | 0.890 | 0.870 | 0.020 | 0.856 | −0.014 | 0.034 |
| With severe pain/discomfort | 0.360 | 0.050 | 0.310 | 0.119 | 0.069 | 0.241 |
| Without pain/discomfort | 0.920 | 0.910 | 0.010 | 0.898 | −0.012 | 0.022 |
| Sakthong *et al*., (2008)9 | T2D | Patients with T2D | 0.810 | 0.760 | 0.050 | 0.745 | −0.015 | 0.065 |
| HbA1c <7% | 0.830 | 0.790 | 0.040 | 0.773 | −0.017 | 0.057 |
| HbA1c ≤7% | 0.800 | 0.750 | 0.050 | 0.731 | −0.019 | 0.069 |
| Neuropathy (No) | 0.840 | 0.810 | 0.030 | 0.787 | −0.023 | 0.053 |
| Neuropathy (Yes) | 0.770 | 0.690 | 0.080 | 0.689 | −0.001 | 0.081 |
| Retinopathy (No) | 0.820 | 0.780 | 0.040 | 0.759 | −0.021 | 0.061 |
| Retinopathy (Yes) | 0.760 | 0.690 | 0.070 | 0.675 | −0.015 | 0.085 |
| Nephropathy (No) | 0.820 | 0.770 | 0.050 | 0.759 | −0.011 | 0.061 |
| Nephropathy (Yes) | 0.750 | 0.670 | 0.080 | 0.662 | −0.008 | 0.088 |
| Cardiovascular (No) | 0.830 | 0.780 | 0.050 | 0.773 | −0.007 | 0.057 |
| Cardiovascular (Yes) | 0.730 | 0.650 | 0.080 | 0.634 | −0.016 | 0.096 |
| Sullivan *et al*., (2016)10 | Diabetes | NA | 0.792 | 0.719 | 0.070 | 0.720 | 0.001 | 0.072 |
| Wang *et al*., (2020)11 | Rural population | NA | 0.943 | 0.930 | 0.013 | 0.930 | 0 | 0.013 |
| **Average deviation** | | | 0.0794 | 0.1138 | 0.0353 | 0.1104 | 0.0065 | 0.0310 |
| **Average** | | | 0.763 | 0.679 | 0.083 | 0.679 | 0 | 0.084 |

**Note:** Data presented are means as reported in the publications.

**Abbreviations:** CD4, cluster of differentiation 4; EQ-5D-3L, EuroQoL five-dimensions three-levels; F, female; HbA1c, glycated haemoglobin; HIV, human immunodeficiency virus; M, male; MHS, mental health summary; NA, not available; NR, not reported; PHS, physical health summary; RCT, randomized controlled trial; SD, standard deviation; T2D, type 2 diabetes mellitus; UK, United Kingdom; US, United States; Δa, difference in the reported mean UK and US utilities; Δb, difference between the predicted mean UK utilities through algorithm and the reported UK utilities; Δc, difference in the reported mean US utilities and the predicted mean UK utilities.

# **References**

1. Bansback N, Tsuchiya A, Brazier J, Anis A. Canadian valuation of EQ-5D health states: preliminary value set and considerations for future valuation studies. *PLoS One*. 2012;7(2):e31115. doi:10.1371/journal.pone.0031115
2. Falk Hvidberg M, Hernandez Alava M. Catalogues of EQ-5D-3L Health-Related Quality of Life Scores for 199 Chronic Conditions and Health Risks for Use in the UK and the USA. *Pharmacoeconomics*. 2023;41(10):1287-1388. doi:10.1007/s40273-023-01285-4
3. Huang IC, Willke RJ, Atkinson MJ, Lenderking WR, Frangakis C, Wu AW. US and UK versions of the EQ-5D preference weights: does choice of preference weights make a difference? *Qual Life Res*. 2007;16(6):1065-72. doi:10.1007/s11136-007-9206-4
4. Karlsson JA, Nilsson JA, Neovius M, et al. National EQ-5D tariffs and quality-adjusted life-year estimation: comparison of UK, US and Danish utilities in south Swedish rheumatoid arthritis patients. *Ann Rheum Dis*. 2011;70(12):2163-6. doi:10.1136/ard.2011.153437
5. Kiadaliri AA, Eliasson B, Gerdtham UG. Does the choice of EQ-5D tariff matter? A comparison of the Swedish EQ-5D-3L index score with UK, US, Germany and Denmark among type 2 diabetes patients. *Health Qual Life Outcomes*. 2015;13:145. doi:10.1186/s12955-015-0344-z
6. Lien K, Tam VC, Ko YJ, Mittmann N, Cheung MC, Chan KK. Impact of country-specific EQ-5D-3L tariffs on the economic value of systemic therapies used in the treatment of metastatic pancreatic cancer. *Curr Oncol*. 2015;22(6):e443-52. doi:10.3747/co.22.2592
7. Mozzi A, Meregaglia M, Lazzaro C, Tornatore V, Belfiglio M, Fattore G. A comparison of EuroQol 5-Dimension health-related utilities using Italian, UK, and US preference weights in a patient sample. *Clinicoecon Outcomes Res*. 2016;8:267-74. doi:10.2147/CEOR.S98226
8. Noyes K, Dick AW, Holloway RG. The implications of using US-specific EQ-5D preference weights for cost-effectiveness evaluation. *Med Decis Making*. 2007;27(3):327-34. doi:10.1177/0272989X07301822
9. Sakthong P, Charoenvisuthiwongs R, Shabunthom R. A comparison of EQ-5D index scores using the UK, US, and Japan preference weights in a Thai sample with type 2 diabetes. *Health Qual Life Outcomes*. 23 2008;6:71. doi:10.1186/1477-7525-6-71
10. Sullivan PW, Ghushchyan VH. EQ-5D Scores for Diabetes-Related Comorbidities. *Value Health*. 2016;19(8):1002-1008. doi:10.1016/j.jval.2016.05.018
11. Wang H, Cao C, Guo C, et al. An evaluation of EQ-5D-3L health utility scores using five country-specific tariffs in a rural population aged 45-69 years in Hua county, Henan province, China. *Health Qual Life Outcomes*. 2020;18(1):228. doi:10.1186/s12955-020-01476-z
